# Supplementary material for: Reproducibility of preclinical animal research improves with heterogeneity of study samples
Source: PubMed Central journal article supplement (PMC5823461; doi:10.1371/journal.pbio.2003693), 2018-02-22
Supplement: pbio.2003693.s002.pdf [file pbio.2003693.s002.pdf]

---

## Initialization

```
Needs["ANOVA`"]
```

## Functions

```
zvalue[n_] := Which[n == 12, 2.201, n == 24, 2.069, n == 48, 2.021]

getOneES[labslist_] := Module[{animalsperlabcondition, controls,
  treatments, se, meansdiff, lower, upper, ci, tp, anovap, ianovap},
  animalsperlabcondition = totalsamplesize / (Length[labslist] * 2);
  controls = Flatten[Table[
    RandomReal[NormalDistribution[data[[labslist[[i]], 4], data[[labslist[[i]], 6]],
      animalsperlabcondition] / data[[labslist[[i]], 4], {i, Length[labslist]}]];
  treatments = Flatten[Table[RandomReal[NormalDistribution[
    data[[labslist[[i]], 5], data[[labslist[[i]], 7]], animalsperlabcondition] /
    data[[labslist[[i]], 4], {i, Length[labslist]}]];
  se = Sqrt[(StandardDeviation[treatments]^2 + StandardDeviation[controls]^2) /
    (totalsamplesize / 2)];
  meansdiff = Mean[controls - treatments];
  tp = Quiet[TTest[{controls, treatments}]];
  anovap =
    If[Length[labslist] == 1, ANOVA[Transpose[{Join[Table[0, {Length[controls]}],
      Table[1, {Length[treatments]}]], Join[controls, treatments]}]],
      1, 2, 1, 1, 5], ANOVA[Transpose[{Join[Table[0, {Length[controls]}],
      Table[1, {Length[treatments]}]],
      Flatten[Join[Table[Table[i, {animalsperlabcondition}], {i, nlabs}],
        Table[Table[i, {animalsperlabcondition}], {i, nlabs}]]],
      Join[controls, treatments]}], {x, y}, {x, y}][[1, 2, 1, 1, 5]];
  ianovap = If[Length[labslist] == 1, ANOVA[Transpose[
    {Join[Table[0, {Length[controls]}], Table[1, {Length[treatments]}]],
      Join[controls, treatments]}]], [1, 2, 1, 1, 5], ANOVA[Transpose[
    {Join[Table[0, {Length[controls]}], Table[1, {Length[treatments]}]],
      Flatten[Join[Table[Table[i, {animalsperlabcondition}], {i, nlabs}],
        Table[Table[i, {animalsperlabcondition}], {i, nlabs}]]],
      Join[controls, treatments]}], {x, y, x y}, {x, y}][[1, 2, 1, 1, 5]];
  lower = meansdiff - zvalue[totalsamplesize] * se;
  upper = meansdiff + zvalue[totalsamplesize] * se;
  ci = upper - lower;
  {truees >= lower && truees <= upper, lower > 0 || upper < 0, tp, tp < 0.05,
    anovap, anovap < 0.05, ianovap, ianovap < 0.05, controls, treatments}
  (*1. capture, 2. sig CI method, 3. p (t-test), 4. sig (t-test),
  5. p (x+y ANOVA), 6. sig (x+y ANOVA), 7. p (x*y ANOVA),
  8. sig (x*y ANOVA), 9. controls, 10. treatments*)
]
```

```

getNoDifferenceES[labslist_] :=
Module[{animalsperlabcondition, controls, treatments,
  se, meansdiff, lower, upper, ci, tp, anovap, ianovap},
  animalsperlabcondition = totalsamplesize / (Length[labslist] * 2);
  controls = Flatten[Table[
    RandomReal[NormalDistribution[(data[[labslist[[i]], 5]] + data[[labslist[[i]], 4]]) /
      2, (data[[labslist[[i]], 6]] + data[[labslist[[i]], 7]]) / 2],
    animalsperlabcondition] / data[[labslist[[i]], 4], {i, Length[labslist]}]];
  treatments = Flatten[Table[RandomReal[NormalDistribution[
    (data[[labslist[[i]], 5]] + data[[labslist[[i]], 4]]) / 2,
    (data[[labslist[[i]], 6]] + data[[labslist[[i]], 7]]) / 2],
    animalsperlabcondition] / data[[labslist[[i]], 4], {i, Length[labslist]}]];
  se = Sqrt[(StandardDeviation[treatments]^2 + StandardDeviation[controls]^2) /
    (totalsamplesize / 2)];
  meansdiff = Mean[controls - treatments];
  tp = Quiet[TTest[{controls, treatments}]];
  anovap =
  If[Length[labslist] == 1, ANOVA[Transpose[{Join[Table[0, {Length[controls]}],
    Table[1, {Length[treatments]}]}, Join[controls, treatments]}]] [
    1, 2, 1, 1, 5], ANOVA[Transpose[{Join[Table[0, {Length[controls]}],
    Table[1, {Length[treatments]}]},
    Flatten[Join[Table[Table[i, {animalsperlabcondition}], {i, nlabs}],
    Table[Table[i, {animalsperlabcondition}], {i, nlabs}]]],
    Join[controls, treatments]}], {x, y}, {x, y}][[1, 2, 1, 1, 5]];
  ianovap = If[Length[labslist] == 1, ANOVA[Transpose[
    {Join[Table[0, {Length[controls]}], Table[1, {Length[treatments]}]},
    Join[controls, treatments]}]] [1, 2, 1, 1, 5], ANOVA[Transpose[
    {Join[Table[0, {Length[controls]}], Table[1, {Length[treatments]}]},
    Flatten[Join[Table[Table[i, {animalsperlabcondition}], {i, nlabs}],
    Table[Table[i, {animalsperlabcondition}], {i, nlabs}]]],
    Join[controls, treatments]}], {x, y, x y}, {x, y}][[1, 2, 1, 1, 5]];
  lower = meansdiff - zvalue[totalsamplesize] * se;
  upper = meansdiff + zvalue[totalsamplesize] * se;
  ci = upper - lower;
  {truees >= lower && truees <= upper, lower > 0 || upper < 0, tp, tp < 0.05,
  anovap, anovap < 0.05, ianovap, ianovap < 0.05, controls, treatments}
  (*1. capture, 2. sig CI method, 3. p (t-test), 4. sig (t-test),
  5. p (x+y ANOVA), 6. sig (x+y ANOVA), 7. p (x*y ANOVA),
  8. sig (x*y ANOVA), 9. controls, 10. treatments*)
]

```

```

getCI[{controls_, treatments_}] := Module[{se, meansdiff, lower, upper, ci},
  se = Sqrt[(StandardDeviation[treatments]^2 + StandardDeviation[controls]^2) /
    (totalsamplesize/2)];
  meansdiff = Mean[controls - treatments];
  lower = meansdiff - zvalue[totalsamplesize] * se;
  upper = meansdiff + zvalue[totalsamplesize] * se;
  ci = upper - lower;
  ci
]

dor[{tpr_, fpr_}] := (tpr / fpr) / ((1 - tpr) / (1 - fpr))

summary[mat_] := {N[Count[mat[[All, 1]], True] / Length[mat]],
  N[Count[mat[[All, 2]], True] / Length[mat]],
  Mean[mat[[All, 3]], N[Count[mat[[All, 4]], True] / Length[mat]],
  Mean[mat[[All, 5]], N[Count[mat[[All, 6]], True] / Length[mat]],
  Mean[mat[[All, 7]], N[Count[mat[[All, 8]], True] / Length[mat]]}

getParam[labslist_] := Module[{animalsperlabcondition,
  controls, treatments, se, meansdiff, lower, upper, ci},
  animalsperlabcondition = totalsamplesize / (Length[labslist] * 2);
  controls = Flatten[Table[
    RandomReal[NormalDistribution[data[[labslist[[i]], 4], data[[labslist[[i]], 6]],
      animalsperlabcondition] / data[[labslist[[i]], 4], {i, Length[labslist]}]];
  treatments = Flatten[Table[RandomReal[NormalDistribution[
    data[[labslist[[i]], 5], data[[labslist[[i]], 7]], animalsperlabcondition] /
    data[[labslist[[i]], 4], {i, Length[labslist]}]];
  se = Sqrt[(StandardDeviation[treatments]^2 + StandardDeviation[controls]^2) /
    (totalsamplesize/2)];
  meansdiff = Mean[controls - treatments];
  lower = meansdiff - zvalue[totalsamplesize] * se;
  upper = meansdiff + zvalue[totalsamplesize] * se;
  ci = upper - lower;
  {Mean[controls], Mean[treatments],
  StandardDeviation[controls], StandardDeviation[treatments],
  Round[totalsamplesize/2], Round[totalsamplesize/2]}
]

calcMeansDiff[{meanc_, meant_, sdc_, sdt_, nc_, nt_}] := {meanc - meant, Null,
  (meanc - meant) - Sqrt[sdc^2 + sdt^2], (meanc - meant) + Sqrt[sdc^2 + sdt^2]}

makeLineS[simdata_, i_] := Line[{{simdata[[i, -2]], i}, {simdata[[i, -1]], i}}]

makePointS[simdata_, i_] := Point[{simdata[[i, -4]], i}]

```

```

figcpF[df1data_] := Show[ListLinePlot[df1data,
  PlotStyle → {Directive[Dashed, Thickness[0.01], RGBColor[0.27, 0.42, 0.67]],
    Directive[Dashed, Thickness[0.01], RGBColor[0.82, 0.45, 0.29]],
    Directive[Dashed, Thickness[0.01], RGBColor[0.60, 0.6, 0.6]]},
  Frame → True, FrameStyle → Thickness[0.005],
  FrameTicks → {{{0, 0.2, 0.4, 0.6, 0.8}, None}, {{1, 2, 3, 4}, None}},
  FrameTicksStyle → Directive[Black, 28],
  PlotRange → {{0.8, 4.2}, {0, 1}}, AspectRatio → 1], ListPlot[df1data,
  PlotStyle → {Directive[PointSize[0.05], RGBColor[0.27, 0.42, 0.67]],
    Directive[PointSize[0.05], RGBColor[0.72, 0.45, 0.29]],
    Directive[PointSize[0.05], RGBColor[0.70, 0.7, 0.56]]}]];

figfnrF[df2data_] := Show[ListLinePlot[df2data,
  PlotStyle → {Directive[Dashed, Thickness[0.01], RGBColor[0.27, 0.42, 0.67]],
    Directive[Dashed, Thickness[0.01], RGBColor[0.82, 0.45, 0.29]],
    Directive[Dashed, Thickness[0.01], RGBColor[0.60, 0.6, 0.6]]},
  Frame → True, FrameStyle → Thickness[0.005],
  FrameTicks → {{{0, 0.1, 0.3, 0.5, 0.7}, None}, {{1, 2, 3, 4}, None}},
  FrameTicksStyle → Directive[Black, 28],
  PlotRange → {{0.8, 4.2}, {0, 0.85}}, AspectRatio → 1], ListPlot[df2data,
  PlotStyle → {Directive[PointSize[0.05], RGBColor[0.27, 0.42, 0.67]],
    Directive[PointSize[0.05], RGBColor[0.72, 0.45, 0.29]],
    Directive[PointSize[0.05], RGBColor[0.70, 0.7, 0.56]]}]];

figdorF[df3data_] := Show[ListLinePlot[df3data, ScalingFunctions → "Log",
  PlotStyle → {Directive[Dashed, Thickness[0.01], RGBColor[0.27, 0.42, 0.67]],
    Directive[Dashed, Thickness[0.01], RGBColor[0.82, 0.45, 0.29]],
    Directive[Dashed, Thickness[0.01], RGBColor[0.60, 0.6, 0.6]]},
  Frame → True, FrameStyle → Thickness[0.005],
  FrameTicks → {{{10, 100, 500}, None}, {{1, 2, 3, 4}, None}},
  FrameTicksStyle → Directive[Black, 28],
  PlotRange → {{0.5, 4.5}, {2, 2000}}, AspectRatio → 1],
ListPlot[df3data, ScalingFunctions → "Log",
  PlotStyle → {Directive[PointSize[0.05], RGBColor[0.27, 0.42, 0.67]],
    Directive[PointSize[0.05], RGBColor[0.72, 0.45, 0.29]],
    Directive[PointSize[0.05], RGBColor[0.70, 0.7, 0.56]]}]];

cs[input_] := Module[{a},
  a = Count[Table[input[[i, 1]] && input[[i, 6]], {i, Length[input]}], True];
  N[a / Length[input]]
] (*gives the proportion of correct outcomes of all studies*)

```

```
power[{x1_, x2_, s1_, s2_, n1_, n2_}] := Module[{d, criticalt, delta, meansdiff},
  meansdiff = Abs[x1 - x2];
  d = meansdiff / Sqrt[(s1^2 + s2^2) / 2];
  criticalt =
    InverseSurvivalFunction[StudentTDistribution[0, 1, (n1 + n2 - 2)], 0.025];
  delta = d Sqrt[(n1 n2) / (n1 + n2)];
  1 - NIntegrate[PDF[StudentTDistribution[delta, 1, (n1 + n2 - 2)], x],
    {x, -criticalt, criticalt}]
]
```

---

## I. Hypothermia Data Set Meta Analysis

The true effect size was estimated using a random effects meta analysis (with REML estimator) in the R-package *metafor* (file MultilabR04.R). The weighted means difference is **0.4781**

```
truees = 0.4781
```

---

## 2. Simulation

### Simulation

```
nsims = 100 000;

totalsamplesize = 12; (*This is the total number of animals
  in the study. To be repeated with 24 and 48 accordingly*)

nlabs = 1; (*nlabs is the number of participating laboratories. To be
  repeated with 2, 3, and for total sample sizes of 24 and 48 also 4*)
res = Table[getOneES[RandomSample[Range[50], nlabs]], {nsims}];

{Count[res[[All, 1]], True] / (nsims / 100.),
  Count[res[[All, 2]], True] / (nsims / 100.), Count[res[[All, 4]], True] / (nsims / 100.),
  Count[res[[All, 6]], True] / (nsims / 100.), Count[res[[All, 8]], True] / (nsims / 100.)}
```

This gives 1. capture rate, 2. TPR CI method, 3. TPR t-test, 4. TPR main effect ANOVA, 5. TPR full ANOVA

```
contr = res[[All, 9]];
Export[StringJoin["ml4n",
  ToString[totalsamplesize], "1", ToString[nlabs], "c.csv"], contr];
treatm = res[[All, 10]];
Export[StringJoin["ml4n",
  ToString[totalsamplesize], "1", ToString[nlabs], "t.csv"], treatm];
result = res[[All, 1 ;; 8]];
Save[StringJoin["ml4n",
  ToString[totalsamplesize], "1", ToString[nlabs], "res"], result];

resnd = Table[getNoDifferenceES[RandomSample[Range[50], nlabs]], {nsims}];
```

```
{Count[resnd[[All, 1]], True] / (nsims / 100.),
  Count[resnd[[All, 2]], True] / (nsims / 100.),
  Count[resnd[[All, 4]], True] / (nsims / 100.),
  Count[resnd[[All, 6]], True] / (nsims / 100.),
  Count[resnd[[All, 8]], True] / (nsims / 100.)}
```

This gives 1. capture rate, 2. FPR CI method, 3. FPR t-test, 4. FPR main effect ANOVA, 5. FPR full ANOVA

```
contrnd = resnd[[All, 9]];
Export[StringJoin["ml4ndn",
  ToString[totalsamplesize], "1", ToString[nlabs], "c.csv"], contrnd];
treatmnd = resnd[[All, 10]];
Export[StringJoin["ml4ndn",
  ToString[totalsamplesize], "1", ToString[nlabs], "t.csv"], treatmnd];
resultnd = resnd[[All, 1 ;; 8]];
Save[StringJoin["ml4ndn",
  ToString[totalsamplesize], "1", ToString[nlabs], "res"], resultnd];
```

## CI

```
totalsamplesize = 12;
(*To be repeated for N= 24 and 48 and nlabs=2, 3, 4 accordingly*)
nlabs = 1;
control = Import[StringJoin["ml4n",
  ToString[totalsamplesize], "1", ToString[nlabs], "c.csv"]];
treatment = Import[StringJoin["ml4n", ToString[totalsamplesize],
  "1", ToString[nlabs], "t.csv"]];
mat = Transpose[{control, treatment}];
ciwn1211 = Mean[getCI /@ mat];
```

## Figure 2B - 2D

```
r1211 = summary[Get[StringJoin["ml4n", ToString[12], "1", ToString[1], "res"]]];
r1212 = summary[Get[StringJoin["ml4n", ToString[12], "1", ToString[2], "res"]]];
r1213 = summary[Get[StringJoin["ml4n", ToString[12], "1", ToString[3], "res"]]];
r2411 = summary[Get[StringJoin["ml4n", ToString[24], "1", ToString[1], "res"]]];
r2412 = summary[Get[StringJoin["ml4n", ToString[24], "1", ToString[2], "res"]]];
r2413 = summary[Get[StringJoin["ml4n", ToString[24], "1", ToString[3], "res"]]];
r2414 = summary[Get[StringJoin["ml4n", ToString[24], "1", ToString[4], "res"]]];
r4811 = summary[Get[StringJoin["ml4n", ToString[48], "1", ToString[1], "res"]]];
r4812 = summary[Get[StringJoin["ml4n", ToString[48], "1", ToString[2], "res"]]];
r4813 = summary[Get[StringJoin["ml4n", ToString[48], "1", ToString[3], "res"]]];
r4814 = summary[Get[StringJoin["ml4n", ToString[48], "1", ToString[4], "res"]]];

```

```

cp12 = {r1211[[1]], r1212[[1]], r1213[[1]]};
cp24 = {r2411[[1]], r2412[[1]], r2413[[1]], r2414[[1]]};
cp48 = {r4811[[1]], r4812[[1]], r4813[[1]], r4814[[1]]};

(*This gives the coverage probability for N=12, 24 and 48 and 1 to 4 labs *)

wci12 = {ciwn1211, ciwn1212, ciwn1213};
wci24 = {ciwn2411, ciwn2412, ciwn2413, ciwn2414};
wci48 = {ciwn4811, ciwn4812, ciwn4813, ciwn4814};

(*This gives the widths of the confidence intervals for N=12,
24 and 48 and 1 to 4 labs *)

fnr12 = 1 - {r1211[[6]], r1212[[6]], r1213[[6]]};
fnr24 = 1 - {r2411[[6]], r2412[[6]], r2413[[6]], r2414[[6]]};
fnr48 = 1 - {r4811[[6]], r4812[[6]], r4813[[6]], r4814[[6]]};

(*This gives the false negative rate for N=12, 24 and 48 and 1 to 4 labs *)

```

## Supplementary S2

```

nr1211 =
  summary[Get[StringJoin["ml4ndn", ToString[12], "1", ToString[1], "res"]]];
nr1212 = summary[Get[StringJoin["ml4ndn",
  ToString[12], "1", ToString[2], "res"]]];
nr1213 = summary[Get[StringJoin["ml4ndn", ToString[12],
  "1", ToString[3], "res"]]];
nr2411 = summary[Get[StringJoin["ml4ndn", ToString[24],
  "1", ToString[1], "res"]]];
nr2412 = summary[Get[StringJoin["ml4ndn", ToString[24],
  "1", ToString[2], "res"]]];
nr2413 = summary[Get[StringJoin["ml4ndn", ToString[24],
  "1", ToString[3], "res"]]];
nr2414 = summary[Get[StringJoin["ml4ndn", ToString[24],
  "1", ToString[4], "res"]]];
nr4811 = summary[Get[StringJoin["ml4ndn", ToString[48],
  "1", ToString[1], "res"]]];
nr4812 = summary[Get[StringJoin["ml4ndn", ToString[48],
  "1", ToString[2], "res"]]];
nr4813 = summary[Get[StringJoin["ml4ndn", ToString[48],
  "1", ToString[3], "res"]]];
nr4814 = summary[Get[StringJoin["ml4ndn", ToString[48],
  "1", ToString[4], "res"]]];

fpr12 = {nr1211[[6]], nr1212[[6]], nr1213[[6]]};
fpr24 = {nr2411[[6]], nr2412[[6]], nr2413[[6]], nr2414[[6]]};
fpr48 = {nr4811[[6]], nr4812[[6]], nr4813[[6]], nr4814[[6]]};

fdor12 = {{r1211[[6]], nr1211[[6]]}, {r1212[[6]], nr1212[[6]]}, {r1213[[6]], nr1213[[6]]}}

```

```

fdor24 = {{r2411[[6]], nr2411[[6]], {r2412[[6]], nr2412[[6]]},
          {r2413[[6]], nr2413[[6]]}, {r2414[[6]], nr2414[[6]]}}
fdor48 = {{r4811[[6]], nr4811[[6]], {r4812[[6]], nr4812[[6]]},
          {r4813[[6]], nr4813[[6]]}, {r4814[[6]], nr4814[[6]]}}
{dor /@ fdor12, dor /@ fdor24, dor /@ fdor48}

```

## PSA

```

d1211 = Get[StringJoin["ml4n", ToString[12], "1", ToString[1], "res"]];
d1212 = Get[StringJoin["ml4n", ToString[12], "1", ToString[2], "res"]];
d1213 = Get[StringJoin["ml4n", ToString[12], "1", ToString[3], "res"]];
d2411 = Get[StringJoin["ml4n", ToString[24], "1", ToString[1], "res"]];
d2412 = Get[StringJoin["ml4n", ToString[24], "1", ToString[2], "res"]];
d2413 = Get[StringJoin["ml4n", ToString[24], "1", ToString[3], "res"]];
d2414 = Get[StringJoin["ml4n", ToString[24], "1", ToString[4], "res"]];
d4811 = Get[StringJoin["ml4n", ToString[48], "1", ToString[1], "res"]];
d4812 = Get[StringJoin["ml4n", ToString[48], "1", ToString[2], "res"]];
d4813 = Get[StringJoin["ml4n", ToString[48], "1", ToString[3], "res"]];
d4814 = Get[StringJoin["ml4n", ToString[48], "1", ToString[4], "res"]];

hypocs12 = cs /@ {d1211, d1212, d1213}
hypocs24 = cs /@ {d2411, d2412, d2413, d2414}
hypocs48 = cs /@ {d4811, d4812, d4813, d4814}

```

## 3. Comparing Inference Techniques

### Systematic comparison FNR

```

row = {"12k2", "12k3", "24k1", "24k2", "24k3", "48k2", "48k3", "48k4"};
glmm2 = Transpose[Prepend[Table[1 - Import[
  StringJoin["F:/Paper Multilab/Analysis 2/GLMMRES01/glmmoutcomesD",
    ToString[i], ".csv"]][2 ;; 9, 6], {i, 12}], row]];

```

### Study I

```

sn = 1;
d = ToString[sn];
n1211 = Get[StringJoin["d", d, "ml4n1211res"]];
n1212 = Get[StringJoin["d", d, "ml4n1212res"]];
n1213 = Get[StringJoin["d", d, "ml4n1213res"]];
d1n12m2 = Prepend[glmm2[[1 ;; 2, sn + 1]], Null];
d1n12ci = {Count[n1211[[All, 2]], False],
  Count[n1212[[All, 2]], False], Count[n1213[[All, 2]], False]} / 1000;
d1n12t = {Count[n1211[[All, 4]], False], Count[n1212[[All, 4]], False],

```



```

Count[n1213[[All, 4]], False] / 1000;
dln12anova = {Count[n1211[[All, 6]], False], Count[n1212[[All, 6]], False],
  Count[n1213[[All, 6]], False] / 1000;
dln12anovax = {Count[n1211[[All, 8]], False], Count[n1212[[All, 8]], False],
  Count[n1213[[All, 8]], False] / 1000;
p12 = ListLinePlot[{dln12m2, dln12ci, dln12t, dln12anova, dln12anovax},
  Frame -> True, AspectRatio -> 1, PlotRange -> {{0.5, 3.5}, {0, 1}},
  FrameTicks -> {{{0.2, 0.4, 0.6, 0.8}, None}, {{1, 2, 3, 4}, None}},
  FrameTicksStyle -> Directive[Black, 20]];
n2411 = Get[StringJoin["d", d, "ml4n2411res"]];
n2412 = Get[StringJoin["d", d, "ml4n2412res"]];
n2413 = Get[StringJoin["d", d, "ml4n2413res"]];
n2414 = Get[StringJoin["d", d, "ml4n2414res"]];
dln24m2 = Prepend[glmm2[[3 ;; 5, sn + 1]], Null];
dln24ci = {Count[n2411[[All, 2]], False], Count[n2412[[All, 2]], False],
  Count[n2413[[All, 2]], False], Count[n2414[[All, 2]], False] / 1000;
dln24t = {Count[n2411[[All, 4]], False], Count[n2412[[All, 4]], False],
  Count[n2413[[All, 4]], False], Count[n2414[[All, 4]], False] / 1000;
dln24anova = {Count[n2411[[All, 6]], False], Count[n2412[[All, 6]], False],
  Count[n2413[[All, 6]], False], Count[n2414[[All, 6]], False] / 1000;
dln24anovax = {Count[n2411[[All, 8]], False], Count[n2412[[All, 8]], False],
  Count[n2413[[All, 8]], False], Count[n2414[[All, 8]], False] / 1000;
p24 = ListLinePlot[{dln24m2, dln24ci, dln24t, dln24anova, dln24anovax},
  Frame -> True, AspectRatio -> 1, PlotRange -> {{0.5, 4.5}, {0, 1}},
  FrameTicks -> {{{0.2, 0.4, 0.6, 0.8}, None}, {{1, 2, 3, 4}, None}},
  FrameTicksStyle -> Directive[Black, 20]];
n4811 = Get[StringJoin["d", d, "ml4n4811res"]];
n4812 = Get[StringJoin["d", d, "ml4n4812res"]];
n4813 = Get[StringJoin["d", d, "ml4n4813res"]];
n4814 = Get[StringJoin["d", d, "ml4n4814res"]];
dln48m2 = Prepend[glmm2[[6 ;; 8, sn + 1]], Null];
dln48ci = {Count[n4811[[All, 2]], False], Count[n4812[[All, 2]], False],
  Count[n4813[[All, 2]], False], Count[n4814[[All, 2]], False] / 1000;
dln48t = {Count[n4811[[All, 4]], False], Count[n4812[[All, 4]], False],
  Count[n4813[[All, 4]], False], Count[n4814[[All, 4]], False] / 1000;
dln48anova = {Count[n4811[[All, 6]], False], Count[n4812[[All, 6]], False],
  Count[n4813[[All, 6]], False], Count[n4814[[All, 6]], False] / 1000;
dln48anovax = {Count[n4811[[All, 8]], False], Count[n4812[[All, 8]], False],
  Count[n4813[[All, 8]], False], Count[n4814[[All, 8]], False] / 1000;
p48 = ListLinePlot[{dln48m2, dln48ci, dln48t, dln48anova, dln48anovax},
  Frame -> True, AspectRatio -> 1, PlotRange -> {{0.5, 4.5}, {0, 1}},
  FrameTicks -> {{{0.2, 0.4, 0.6, 0.8}, None}, {{1, 2, 3, 4}, None}},
  FrameTicksStyle -> Directive[Black, 20]];
cgl = GraphicsGrid[{p12, p24, p48}], ImageSize -> 800]

```

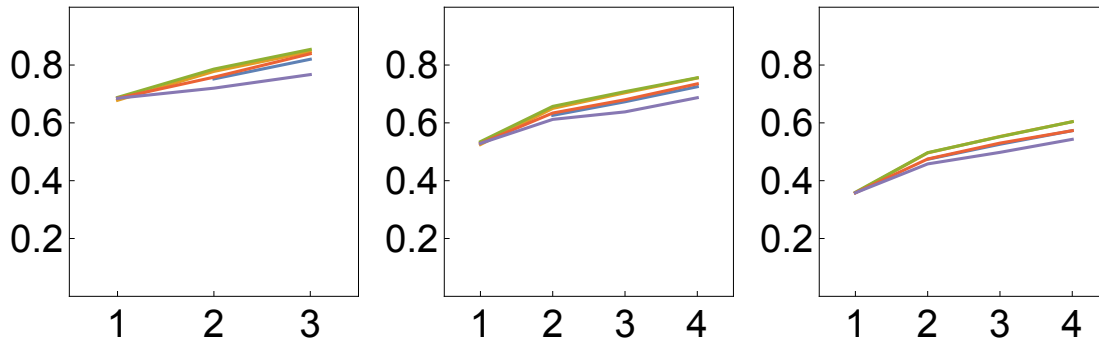

Lines: blue: GLMM: treatment+(1 | lab), violet: ANOVA x+y+xy, red: ANOVA x+y, green: pooled t-test, yellow: CI95%

## Systematic Comparison DOR

```
row = {"12k2", "12k3", "24k1", "24k2", "24k3", "48k2", "48k3", "48k4"};
glmm2 = Transpose[Prepend[Table[1 - Import[
  StringJoin["F:/Paper Multilab/Analysis 2/GLMMRES01/glmmoutcomesD",
    ToString[i], ".csv"]][2 ;; 9, 6], {i, 12}], row]];

row = {"12k2", "12k3", "24k1", "24k2", "24k3", "48k2", "48k3", "48k4"};
glmm2n = Transpose[Prepend[Table[1 - Import[
  StringJoin["F:/Paper Multilab/Analysis 2/GLMMRES01/glmmoutcomesD",
    ToString[i], ".n.csv"]][2 ;; 9, 6], {i, 12}], row]];
```

## Study I

```
sn = 1;
d = ToString[sn];
n1211 = Get[StringJoin["d", d, "m14n1211res"]];
n1212 = Get[StringJoin["d", d, "m14n1212res"]];
n1213 = Get[StringJoin["d", d, "m14n1213res"]];
ndn1211 = Get[StringJoin["d", d, "m14ndn1211res"]];
ndn1212 = Get[StringJoin["d", d, "m14ndn1212res"]];
ndn1213 = Get[StringJoin["d", d, "m14ndn1213res"]];

d1n12m2 = Prepend[1 - glmm2[[1 ;; 2, sn + 1]], Null];
d1n12ci = 1 - {Count[n1211[[All, 2]], False],
  Count[n1212[[All, 2]], False], Count[n1213[[All, 2]], False]} / 1000;
d1n12t = 1 - {Count[n1211[[All, 4]], False], Count[n1212[[All, 4]], False],
  Count[n1213[[All, 4]], False]} / 1000;
d1n12anova = 1 - {Count[n1211[[All, 6]], False], Count[n1212[[All, 6]], False],
  Count[n1213[[All, 6]], False]} / 1000;
d1n12anovax = 1 - {Count[n1211[[All, 8]], False], Count[n1212[[All, 8]], False],
  Count[n1213[[All, 8]], False]} / 1000;

n1211m2 = Prepend[1 - glmm2n[[1 ;; 2, sn + 1]], Null];
```

```

nddl1n2ci = 1 - {Count[ndn1211[[All, 2]], False],
  Count[ndn1212[[All, 2]], False], Count[ndn1213[[All, 2]], False]} / 1000;
nddl1n2t = 1 - {Count[ndn1211[[All, 4]], False], Count[ndn1212[[All, 4]], False],
  Count[ndn1213[[All, 4]], False]} / 1000;
nddl1n2anova = 1 - {Count[ndn1211[[All, 6]], False], Count[ndn1212[[All, 6]], False],
  Count[ndn1213[[All, 6]], False]} / 1000;
nddl1n2anovax = 1 - {Count[ndn1211[[All, 8]], False],
  Count[ndn1212[[All, 8]], False], Count[ndn1213[[All, 8]], False]} / 1000;

p12 =
  ListLinePlot[{dor[{d1n12m2, nddl1n2m2}] /. 1 -> Null, dor[{d1n12ci, nddl1n2ci}],
    dor[{d1n12t, nddl1n2t}], dor[{d1n12anova, nddl1n2anova}],
    dor[{d1n12anovax, nddl1n2anovax}]}, ScalingFunctions -> "Log",
  Frame -> True, AspectRatio -> 1, PlotRange -> {{0.5, 3.5}, {0.1, 1000}},
  FrameTicks -> {{0.1, 0.1, 1, 10, 100, 1000}, None}, {{1, 2, 3, 4}, None}},
  FrameTicksStyle -> Directive[Black, 20]];

n2411 = Get[StringJoin["d", d, "ml4n2411res"]];
n2412 = Get[StringJoin["d", d, "ml4n2412res"]];
n2413 = Get[StringJoin["d", d, "ml4n2413res"]];
n2414 = Get[StringJoin["d", d, "ml4n2414res"]];
ndn2411 = Get[StringJoin["d", d, "ml4ndn2411res"]];
ndn2412 = Get[StringJoin["d", d, "ml4ndn2412res"]];
ndn2413 = Get[StringJoin["d", d, "ml4ndn2413res"]];
ndn2414 = Get[StringJoin["d", d, "ml4ndn2414res"]];

d1n24m2 = Prepend[1 - glm2[[3 ;; 5, sn + 1]], Null];
d1n24ci = 1 - {Count[n2411[[All, 2]], False], Count[n2412[[All, 2]], False],
  Count[n2413[[All, 2]], False], Count[n2414[[All, 2]], False]} / 1000;
d1n24t = 1 - {Count[n2411[[All, 4]], False], Count[n2412[[All, 4]], False],
  Count[n2413[[All, 4]], False], Count[n2414[[All, 4]], False]} / 1000;
d1n24anova = 1 - {Count[n2411[[All, 6]], False], Count[n2412[[All, 6]], False],
  Count[n2413[[All, 6]], False], Count[n2414[[All, 6]], False]} / 1000;
d1n24anovax = 1 - {Count[n2411[[All, 8]], False], Count[n2412[[All, 8]], False],
  Count[n2413[[All, 8]], False], Count[n2414[[All, 8]], False]} / 1000;

nddl1n24m2 = Prepend[1 - glm2n[[3 ;; 5, sn + 1]], Null];
nddl1n24ci = 1 - {Count[ndn2411[[All, 2]], False], Count[ndn2412[[All, 2]], False],
  Count[ndn2413[[All, 2]], False], Count[ndn2414[[All, 2]], False]} / 1000;
nddl1n24t = 1 - {Count[ndn2411[[All, 4]], False], Count[ndn2412[[All, 4]], False],
  Count[ndn2413[[All, 4]], False], Count[ndn2414[[All, 4]], False]} / 1000;
nddl1n24anova = 1 - {Count[ndn2411[[All, 6]], False], Count[ndn2412[[All, 6]], False],
  Count[ndn2413[[All, 6]], False], Count[ndn2414[[All, 6]], False]} / 1000;
nddl1n24anovax = 1 - {Count[ndn2411[[All, 8]], False], Count[ndn2412[[All, 8]], False],
  Count[ndn2413[[All, 8]], False], Count[ndn2414[[All, 8]], False]} / 1000;

p24 =

```

```

ListLinePlot[{dor[{dln24m2, nddln24m2}] /. 1 → Null, dor[{dln24ci, nddln24ci}],
  dor[{dln24t, nddln24t}], dor[{dln24anova, nddln24anova}],
  dor[{dln24anovax, nddln24anovax}]}, ScalingFunctions → "Log",
Frame -> True, AspectRatio → 1, PlotRange → {{0.5, 4.5}, {0.1, 1000}},
FrameTicks → {{0.1, 0.1, 1, 10, 100, 1000}, None}, {{1, 2, 3, 4}, None}},
FrameTicksStyle → Directive[Black, 20]];

n4811 = Get[StringJoin["d", d, "ml4n4811res"]];
n4812 = Get[StringJoin["d", d, "ml4n4812res"]];
n4813 = Get[StringJoin["d", d, "ml4n4813res"]];
n4814 = Get[StringJoin["d", d, "ml4n4814res"]];
ndn4811 = Get[StringJoin["d", d, "ml4ndn4811res"]];
ndn4812 = Get[StringJoin["d", d, "ml4ndn4812res"]];
ndn4813 = Get[StringJoin["d", d, "ml4ndn4813res"]];
ndn4814 = Get[StringJoin["d", d, "ml4ndn4814res"]];

dln48m2 = Prepend[1 - glmm2[[6 ;; 8, sn + 1]], Null];
dln48ci = 1 - {Count[n4811[[All, 2]], False], Count[n4812[[All, 2]], False],
  Count[n4813[[All, 2]], False], Count[n4814[[All, 2]], False]}/1000;
dln48t = 1 - {Count[n4811[[All, 4]], False], Count[n4812[[All, 4]], False],
  Count[n4813[[All, 4]], False], Count[n4814[[All, 4]], False]}/1000;
dln48anova = 1 - {Count[n4811[[All, 6]], False], Count[n4812[[All, 6]], False],
  Count[n4813[[All, 6]], False], Count[n4814[[All, 6]], False]}/1000;
dln48anovax = 1 - {Count[n4811[[All, 8]], False], Count[n4812[[All, 8]], False],
  Count[n4813[[All, 8]], False], Count[n4814[[All, 8]], False]}/1000;

nddln48m2 = Prepend[1 - glmm2n[[6 ;; 8, sn + 1]], Null];
nddln48ci = 1 - {Count[ndn4811[[All, 2]], False], Count[ndn4812[[All, 2]], False],
  Count[ndn4813[[All, 2]], False], Count[ndn4814[[All, 2]], False]}/1000;
nddln48t = 1 - {Count[ndn4811[[All, 4]], False], Count[ndn4812[[All, 4]], False],
  Count[ndn4813[[All, 4]], False], Count[ndn4814[[All, 4]], False]}/1000;
nddln48anova = 1 - {Count[ndn4811[[All, 6]], False], Count[ndn4812[[All, 6]], False],
  Count[ndn4813[[All, 6]], False], Count[ndn4814[[All, 6]], False]}/1000;
nddln48anovax = 1 - {Count[ndn4811[[All, 8]], False], Count[ndn4812[[All, 8]], False],
  Count[ndn4813[[All, 8]], False], Count[ndn4814[[All, 8]], False]}/1000;

p48 =
ListLinePlot[{dor[{dln48m2, nddln48m2}] /. 1 → Null, dor[{dln48ci, nddln48ci}],
  dor[{dln48t, nddln48t}], dor[{dln48anova, nddln48anova}],
  dor[{dln48anovax, nddln48anovax}]}, ScalingFunctions → "Log",
Frame -> True, AspectRatio → 1, PlotRange → {{0.5, 4.5}, {0.1, 1000}},
FrameTicks → {{0.01, 0.1, 1, 10, 100, 1000}, None}, {{1, 2, 3, 4}, None}},
FrameTicksStyle → Directive[Black, 20]];
cgodd1 = GraphicsGrid[{p12, p24, p48}], ImageSize → 800]

```

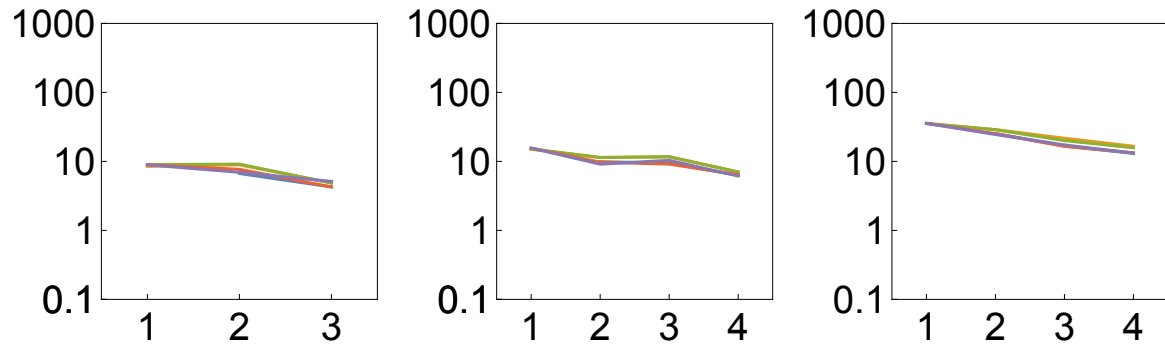

Lines: blue: GLMM: treatment+(1 | lab), violet: ANOVA x+y+xy, red: ANOVA x+y, green: pooled t-test, yellow: CI95%

## 4. Power

```

trueesh = 0.4781;

trueeslist = {0.1978, 0.4602, 0.3896, 0.4749, 0.3446,
              -0.5174, 0.3593, 0.2454, 0.3575, 0.5117, -0.3035, 0.1913};

originalpower =
  Table[power[{Mean[data[[All, 4]] / data[[All, 4]], Mean[data[[All, 5]] / data[[All, 4]],
              Mean[data[[All, 6]] / data[[All, 4]], Mean[data[[All, 7]] / data[[All, 4]],
              data[[i, 2]], data[[i, 3]]}], {i, nos}]

powers12 =
  Table[power[{data[[i, 4]], data[[i, 5]], data[[i, 6]], data[[i, 7]], 12, 12}], {i, nos}]

powers24 =
  Table[power[{data[[i, 4]], data[[i, 5]], data[[i, 6]], data[[i, 7]], 24, 24}], {i, nos}]

powers48 =
  Table[power[{data[[i, 4]], data[[i, 5]], data[[i, 6]], data[[i, 7]], 48, 48}], {i, nos}]

```
